# Supplementary material
Source: PubMed Central journal article supplement (PMC8723901)

Supplemental Figure 1 :

Illustration of a PACU converted to a COVID-ICU

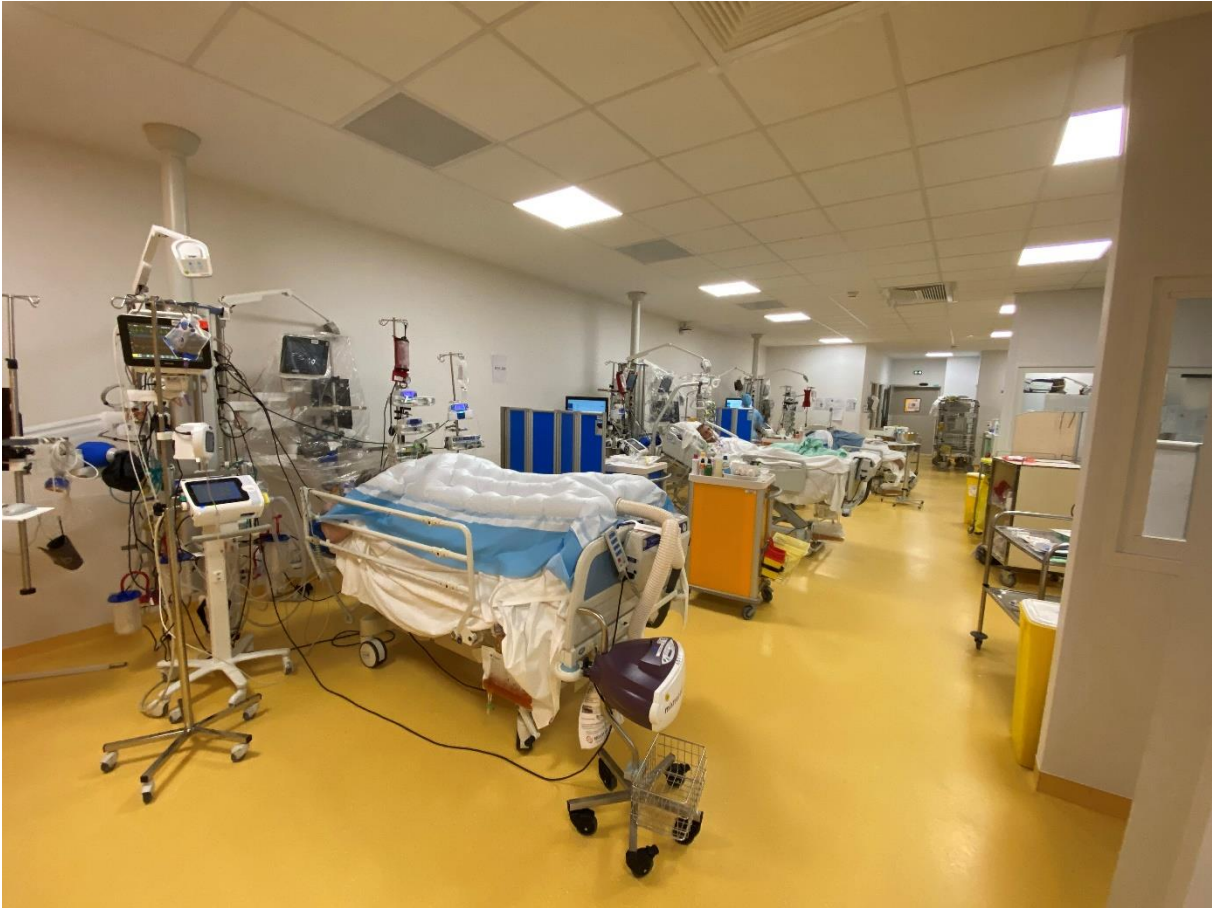

Supplemental Figure 2 :

Illustration of personal protective equipment wearing.

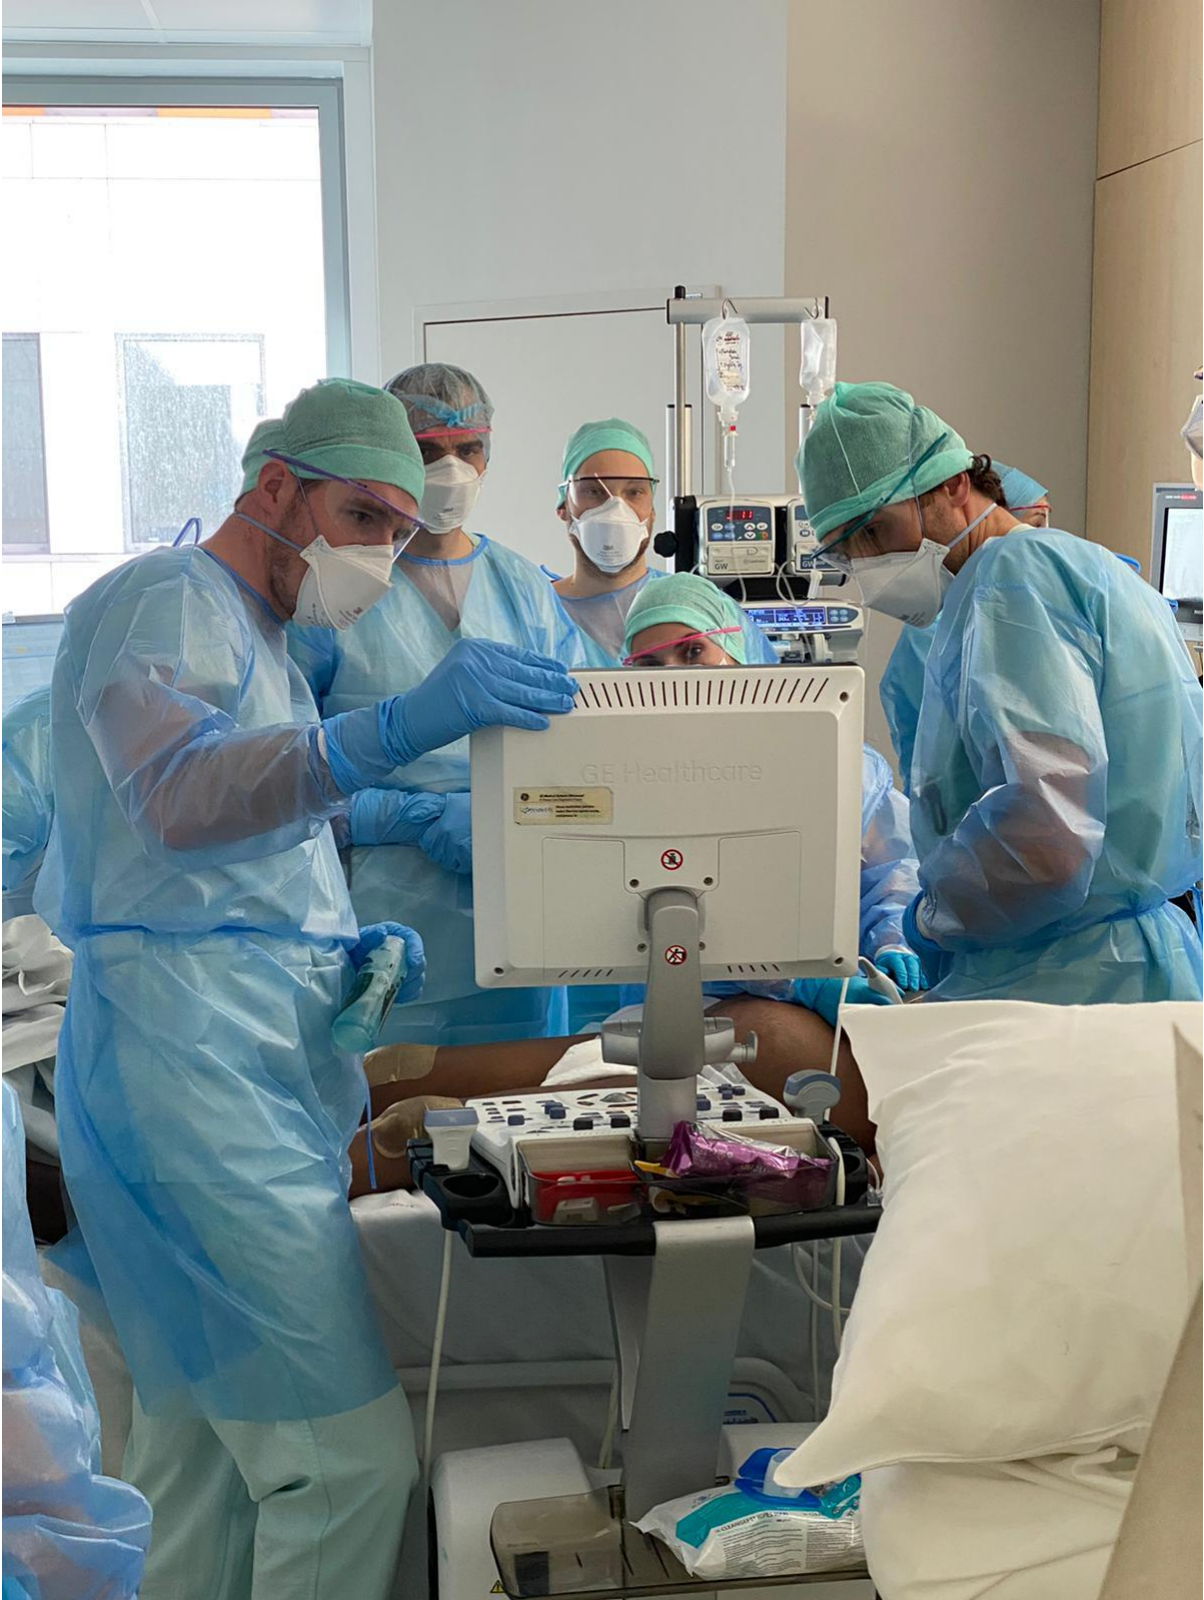

Supplement: Supplemental_Material.pdf [file Supplemental_Material.pdf]
